# Supplementary material for: Development of n-Type, Passivating Nanocrystalline Silicon Oxide Films via Plasma-Enhanced Chemical Vapor Deposition
Source: MDPI journal article supplement (doi:10.3390/solar4010007), 2024-03-11
Supplement: s1 [file s1]

# Development of n-type, passivating nanocrystalline silicon oxide films via plasma-enhanced chemical vapor deposition

Gurleen Kaur <sup>1,2,\*</sup>, Antonio J. Olivares <sup>2</sup> and Pere Roca i Cabarrocas <sup>1,2,\*</sup>

<sup>1</sup>Institut Photovoltaïque d'Ile-de-France (IPVF), 18 Bvd Thomas Gobert, 91120 Palaiseau, France

<sup>2</sup>LPICM, CNRS, Ecole Polytechnique, Institut Polytechnique de Paris, route de Saclay, 91128 Palaiseau, France

\*Correspondence: gur.khera@gmail.com; pere.roca@polytechnique.edu

## Supplementary section

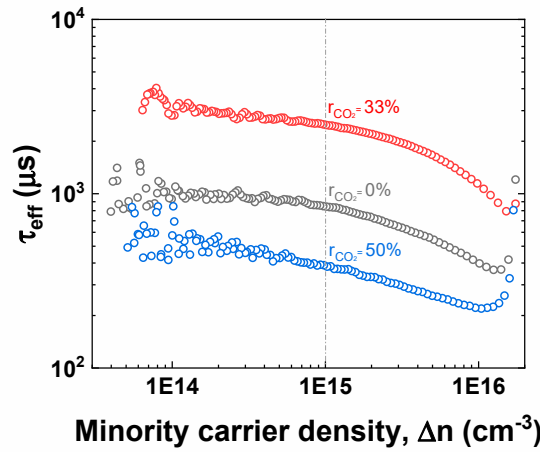

Figure S1. Variation in minority carrier lifetime ( $\tau_{eff}$ ) w.r.t. minority carrier density of nc-SiO<sub>x</sub>:H films deposited with changing CO<sub>2</sub> gas flow ratio.

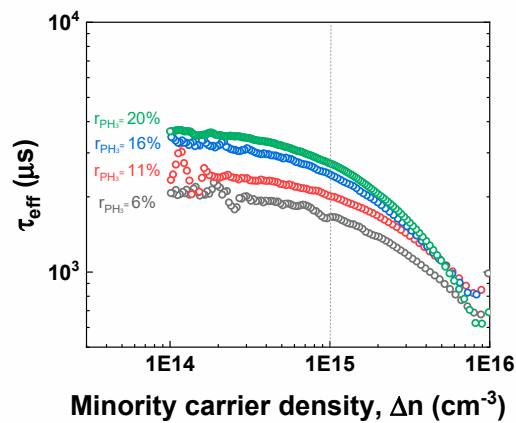

Figure S2. Variation in minority carrier lifetime ( $\tau_{eff}$ ) w.r.t. minority carrier density of nc-SiO<sub>x</sub>:H films deposited with changing PH<sub>3</sub> gas flow ratio.

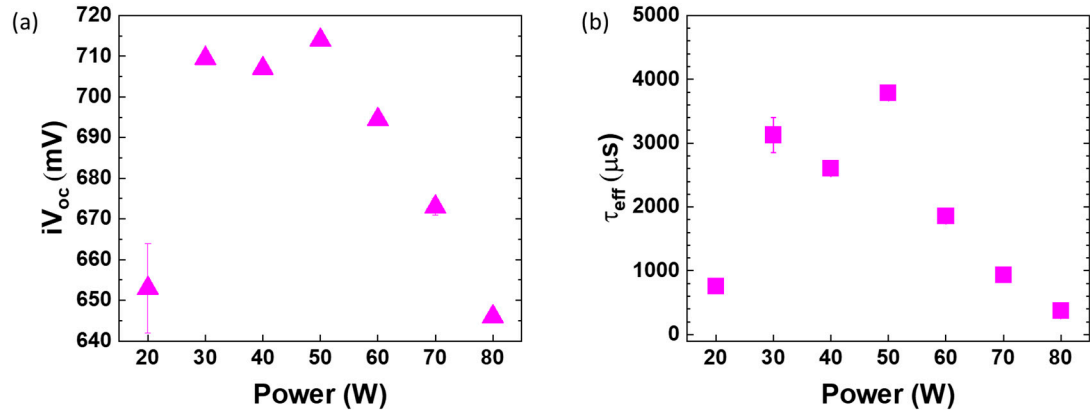

Figure S3. (a) Effective minority carrier lifetime ( $\tau_{eff}$ ) and (b) implied  $V_{oc}$  ( $iV_{oc}$ ) of nanocrystalline silicon oxide (nc-SiO<sub>x</sub>:H) films deposited at various powers (20-80 W).
